# Supplementary material for: Exploring Green Human Resource Adoption and Corporate Sustainability in Nigerian Manufacturing Industry
Source: MDPI journal article supplement (doi:10.3390/su141912635), 2022-10-04
Supplement: s1 [file s1]

Archive with 1 entries (1 files):
- sustainability-1855353-supplementary.pdf
