# Supplementary material for: Exploring Green Human Resource Adoption and Corporate Sustainability in Nigerian Manufacturing Industry
Source: MDPI journal article supplement (doi:10.3390/su141912635), 2022-10-04
Supplement: s1 [file s1 › sustainability-1855353-supplementary.pdf]

# Supplementary Materials

## RESEARCH QUESTIONNAIRE

### SECTION A: BACKGROUND INFORMATION (kindly tick ☐ and fill where applicable)

1. Gender: Male (☐) Female (☐)
2. Year(s) of Service: 0-5 (☐) , 6-10 (☐) , 11 years and above (☐)
3. Highest Educational Qualification: Bachelor's Degree (☐) , Master's Degree (☐) , Ph.D. (☐) .

### SECTION B: GREEN HUMAN RESOURCE

Instruction: please indicate your response by ticking the option that best represent your opinion on a scale of 1 to 5: Where; 5 – Strongly Agree, 4 – Agree, 3 – Neutral, 2- Disagree, 1 – Strongly Disagree.

| <b>Green Recruitment and Selection</b> (please tick any of the items listed that best reflect your opinion on distributive justice in your organisation) |                                                                                |           |          |          |          |           |
|----------------------------------------------------------------------------------------------------------------------------------------------------------|--------------------------------------------------------------------------------|-----------|----------|----------|----------|-----------|
| S/NO                                                                                                                                                     | ITEMS                                                                          | SA<br>(5) | A<br>(4) | N<br>(3) | D<br>(2) | SD<br>(1) |
| 1                                                                                                                                                        | Job description specification includes environmental concerns                  |           |          |          |          |           |
| 2                                                                                                                                                        | We attract green job candidates who use green criteria to select organizations |           |          |          |          |           |
| 3                                                                                                                                                        | Our firm recruits employees who have green awareness                           |           |          |          |          |           |

| <b>Green Training and Development</b> (please tick any of the items listed that best reflect your opinion on procedural justice in your organisation) |                                                                                                                               |           |          |          |          |           |
|-------------------------------------------------------------------------------------------------------------------------------------------------------|-------------------------------------------------------------------------------------------------------------------------------|-----------|----------|----------|----------|-----------|
| S/NO                                                                                                                                                  | ITEMS                                                                                                                         | SA<br>(5) | A<br>(4) | N<br>(3) | D<br>(2) | SD<br>(1) |
| 1                                                                                                                                                     | We have integrated training to create the emotional involvement of employees in environment management                        |           |          |          |          |           |
| 2                                                                                                                                                     | We develop training programs in environment management to increase environmental awareness, skills and expertise of employees |           |          |          |          |           |
| 3                                                                                                                                                     | All training materials are available online                                                                                   |           |          |          |          |           |

|  |                                   |  |  |  |  |  |
|--|-----------------------------------|--|--|--|--|--|
|  | for employee to reduce paper cost |  |  |  |  |  |
|--|-----------------------------------|--|--|--|--|--|

**Green Compensation and Reward** (please tick any of the items listed that best reflect your opinion on interactional justice in your organisation)

| S/NO | ITEMS                                                                                           | SA<br>(5) | A<br>(4) | N<br>(3) | D<br>(2) | SD<br>(1) |
|------|-------------------------------------------------------------------------------------------------|-----------|----------|----------|----------|-----------|
| 1    | The company offers a non- monetary and monetary rewards based on the environmental achievements |           |          |          |          |           |
| 2    | Environmental performance is recognized publically                                              |           |          |          |          |           |
| 3    | We use green performance indicators in our performance management system and appraisals         |           |          |          |          |           |

### SECTION C: CORPORATE SUSTAINABILITY

**Economic Sustainability** (please tick any of the items listed that best reflect your opinion on satisfaction in your organisation)

| S/NO | ITEMS                                                                  | SA<br>(5) | A<br>(4) | N<br>(3) | D<br>(2) | SD<br>(1) |
|------|------------------------------------------------------------------------|-----------|----------|----------|----------|-----------|
| 1    | Greening helps our company design/develop better products              |           |          |          |          |           |
| 2    | We involve employee in formulating environmental strategy              |           |          |          |          |           |
| 3    | In our firm, employees are involved in problem-solving on green issues |           |          |          |          |           |

**Social Sustainability** (please tick any of the items listed that best reflect your opinion on commitment in your organisation)

| S/NO | ITEMS                                                                               | SA<br>(5) | A<br>(4) | N<br>(3) | D<br>(2) | SD<br>(1) |
|------|-------------------------------------------------------------------------------------|-----------|----------|----------|----------|-----------|
| 1    | Our company emphasizes a culture of environmental protection                        |           |          |          |          |           |
| 2    | Organization offers forum for staff to exchange their tacit knowledge               |           |          |          |          |           |
| 3    | In our firm, there is a mutual learning climate among employees for green awareness |           |          |          |          |           |

| <b>Environmental Sustainability</b> (please tick any of the items listed that best reflect your opinion on employee's loyalty in your organisation) |                                                                               |                   |                  |                  |                  |                   |
|-----------------------------------------------------------------------------------------------------------------------------------------------------|-------------------------------------------------------------------------------|-------------------|------------------|------------------|------------------|-------------------|
| <b>S/NO</b>                                                                                                                                         | <b>ITEMS</b>                                                                  | <b>SA<br/>(5)</b> | <b>A<br/>(4)</b> | <b>N<br/>(3)</b> | <b>D<br/>(2)</b> | <b>SD<br/>(1)</b> |
| 1                                                                                                                                                   | My company incorporates environmental management into the business operations |                   |                  |                  |                  |                   |
| 2                                                                                                                                                   | My company has formal environmental management system                         |                   |                  |                  |                  |                   |
| 3                                                                                                                                                   | Organizational vision statements include environmental concern                |                   |                  |                  |                  |                   |
